# Supplementary material
Source: HighWire-hosted journal article supplement (https://tech.snmjournals.org/highwire/filestream/8630/field_highwire_adjunct_files/0/90324_supplemental_data.pdf)

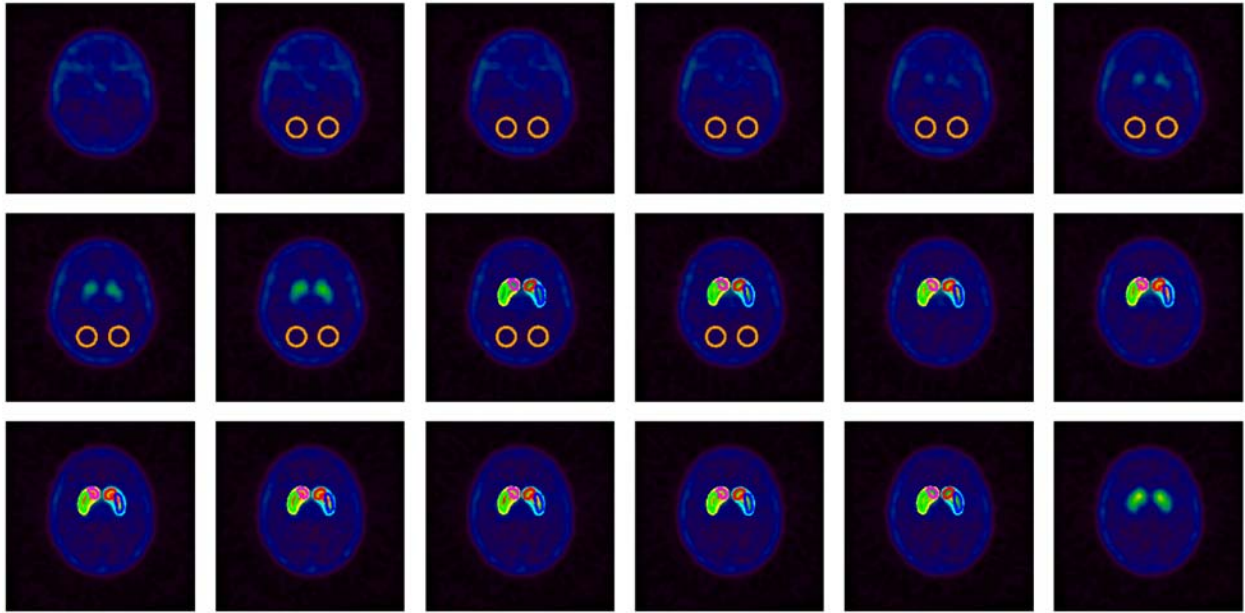

Color version of Figure 1.

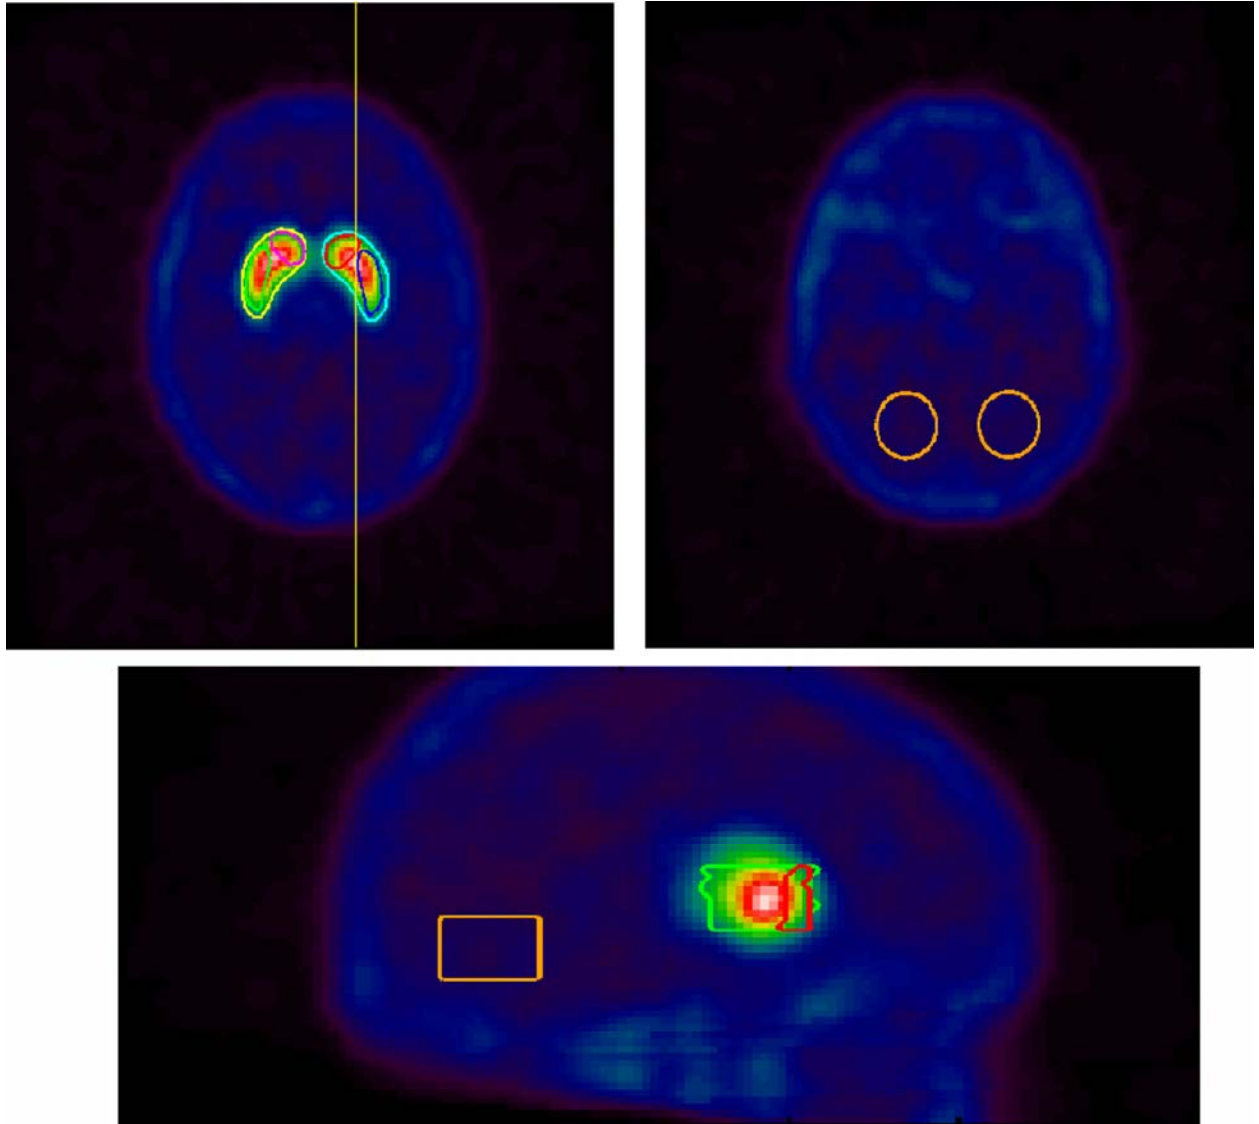

Color version of Figure 2.

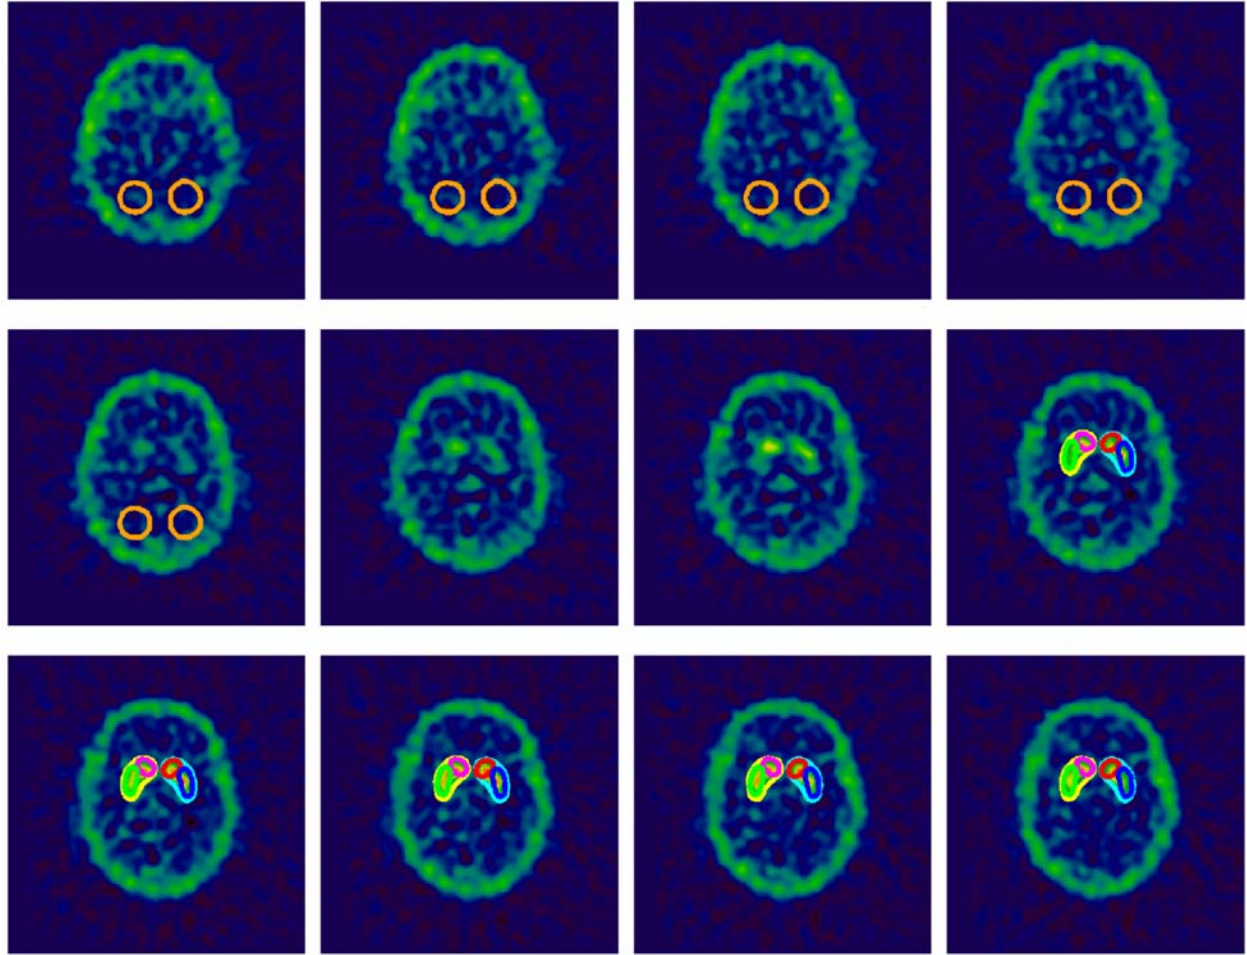

Color version of Figure 3.

Supplement: 90324_supplemental_data.pdf [file 90324_supplemental_data.pdf]
